# Supplementary material for: Influence of the COVID-19 Pandemic on Adherence to Orally Administered Antineoplastics
Source: MDPI journal article supplement (doi:10.3390/jcm11092436), 2022-04-26
Supplement: s1 [file s1]

**Table S1. Description of the orally administered antineoplastics included in the study.**

| <b>ORALLY ADMINISTERED ANTINEOPLASTICS</b> | <b>N</b>   | <b>%</b>    |
|--------------------------------------------|------------|-------------|
| <b>IMMUNOMODULATORS</b>                    | <b>44</b>  | <b>16.4</b> |
| <i>LENALIDOMIDE</i>                        | 41         | 15.3        |
| <i>POMALIDOMIDE</i>                        | 3          | 1.1         |
| <b>CYTOTOXIC CHEMOTHERAPY</b>              | <b>34</b>  | <b>12.7</b> |
| <i>CAPECITABINE</i>                        | 25         | 9.3         |
| <i>TEMOZOLOMIDE</i>                        | 3          | 1.1         |
| <i>TRIFLURIDINE + TIPIRACIL</i>            | 4          | 1.5         |
| <i>LOMUSTINE</i>                           | 1          | 0.4         |
| <i>VINORELBINE</i>                         | 1          | 0.4         |
| <b>DIRECTED THERAPIES</b>                  | <b>186</b> | <b>72.4</b> |
| <i>IBRUTINIB</i>                           | 29         | 10.8        |
| <i>ABIRATERONE</i>                         | 19         | 7.1         |
| <i>RIBOCICLIB</i>                          | 16         | 6           |
| <i>PALBOCICLIB</i>                         | 10         | 3.7         |
| <i>ENZALUTAMIDE</i>                        | 9          | 3.4         |
| <i>RUXOLITINIB</i>                         | 9          | 3.4         |
| <i>IMATINIB</i>                            | 8          | 3           |
| <i>NILOTINIB</i>                           | 8          | 3           |
| <i>OLAPARIB</i>                            | 8          | 3           |
| <i>OSIMERTINIB</i>                         | 8          | 3           |
| <i>DASATINIB</i>                           | 6          | 2.2         |
| <i>NINTEDANIB</i>                          | 6          | 2.2         |
| <i>SUNITINIB</i>                           | 6          | 2.2         |
| <i>ABEMACICLIB</i>                         | 5          | 1.9         |
| <i>ALECTINIB</i>                           | 4          | 1.5         |
| <i>DABRAFENIB + TRAMETINIB</i>             | 4          | 1.5         |
| <i>CABOZANTINIB</i>                        | 3          | 1.1         |
| <i>EVEROLIMUS</i>                          | 3          | 1.1         |
| <i>NIRAPARIB</i>                           | 3          | 1.1         |
| <i>PAZOPANIB</i>                           | 3          | 1.1         |
| <i>SORAFENIB</i>                           | 3          | 1.1         |
| <i>LAPATINIB</i>                           | 2          | 0.8         |
| <i>REGORAFENIB</i>                         | 2          | 0.8         |
| <i>VENETOCLAX</i>                          | 2          | 0.8         |
| <i>VISMODEGIB</i>                          | 2          | 0.8         |
| <i>AFATINIB</i>                            | 1          | 0.4         |
| <i>ALPESINIB</i>                           | 1          | 0.4         |
| <i>AXITINIB</i>                            | 1          | 0.4         |
| <i>ENCORAFENIB</i>                         | 1          | 0.4         |
| <i>LENVATINIB</i>                          | 1          | 0.4         |
| <i>PONATINIB</i>                           | 1          | 0.4         |

|                   |            |            |
|-------------------|------------|------------|
| <i>TIVOZANIB</i>  | <i>1</i>   | <i>0.4</i> |
| <i>VANDETANIB</i> | <i>1</i>   | <i>0.4</i> |
| <b>OTHER</b>      | <b>4</b>   | <b>1.5</b> |
| <i>ANAGRELIDE</i> | <i>4</i>   | <i>1.5</i> |
| <b>TOTAL</b>      | <b>268</b> | <b>100</b> |
